# Supplementary material
Source: PubMed Central journal article supplement (PMC3473097)
Supplement: NIHMS382292-supplement-01.pdf [file NIHMS382292-supplement-01.pdf]

Supplementary Table 1a.

Estimates of fixed effects from individual growth curve analyses of weight change (kg) during exergame intervention from cooperative exergame, competitive exergame, and control conditions.

|                                | Model A       | Model B        |
|--------------------------------|---------------|----------------|
| Intercept                      | 61.41**       | 59.51**        |
|                                | 21.42         | 21.14          |
| Time (in weeks)                | 0.00          | -0.05          |
|                                | 0.19          | 0.19           |
| Cooperative                    | -3.25         | -1.36          |
|                                | 6.55          | 6.35           |
| Cooperative x Time             | <b>-0.15*</b> | -0.10          |
|                                | 0.06          | 0.06           |
| Competitive                    | -1.89         |                |
|                                | 6.59          |                |
| Competitive x Time             | -0.06         |                |
|                                | 0.06          |                |
| Control                        |               | 1.89           |
|                                |               | 6.59           |
| Control x Time                 |               | 0.06           |
|                                |               | 0.06           |
| Baseline Self Efficacy         | 0.17          | 0.17           |
|                                | 0.21          | 0.21           |
| Baseline Self Efficacy x Time  | 0.00          | 0.00           |
|                                | 0.00          | 0.00           |
| Baseline Self Esteem           | <b>1.03†</b>  | <b>1.03†</b>   |
|                                | 0.00          | 0.56           |
| Baseline Self Esteem x Time    | 0.01          | 0.01           |
|                                | 0.00          | 0.00           |
| Baseline Peer Support          | -0.03         | -0.03          |
|                                | 0.18          | 0.18           |
| Baseline Peer Support x Time   | <b>-0.01†</b> | <b>-0.01†</b>  |
|                                | 0.00          | 0.00           |
| Male                           | <b>16.78*</b> | <b>16.78**</b> |
|                                | 5.46          | 5.46           |
| Male x Time                    | -0.08         | -0.08          |
|                                | 0.05          | 0.05           |
| Akaike's information criterion | 910.7         | 910.7          |

Note. \*\*  $p < .01$ . \*  $p < .05$ . †  $p < .10$ . Bold indicates significance and trend. In Model A, Cooperative Exergame = 1 for the cooperative exergame participants, Competitive Exergame = 1 for the competitive exergame participants, and Control = 0 for the control participants. In Model B, Cooperative Exergame = 1 for the cooperative exergame participants, Control = 1 for the control participants, and Competitive = 0 for the competitive participants.

Supplementary Table 1b.

Estimates of fixed effects from individual growth curve analyses of change in self-efficacy during exergame intervention by condition.

|                    |    | Model A  | Model B  |
|--------------------|----|----------|----------|
| Intercept          | B  | 37.06 ** | 36.31 ** |
|                    | SE | 3.00     | 2.75     |
| Time               | B  | -0.02    | 0.03     |
|                    | SE | 0.02     | 0.02     |
| Cooperative        | B  | 0.83     | 1.57     |
|                    | SE | 4.05     | 3.87     |
| Cooperative x Time | B  | 0.08 **  | 0.03     |
|                    | SE | 0.03     | 0.02     |
| Competitive        | B  | -0.74    |          |
|                    | SE | 4.07     |          |
| Competitive x Time | B  | 0.05 †   |          |
|                    | SE | 0.03     |          |
| Control            | B  |          | 0.74     |
|                    | SE |          | 4.07     |
| Control x Time     | B  |          | -0.05 †  |
|                    | SE |          | 0.03     |

*Note.* \*\*  $p < .01$ . \*  $p < .05$ . †  $p < .10$ . In Model A, Cooperative Exergame = 1 for the cooperative exergame participants, Competitive Exergame = 1 for the competitive exergame participants, and Control = 0 for the control participants. In Model B, Cooperative Exergame = 1 for the cooperative exergame participants, Control = 1 for the control participants, and Competitive Exergame = 0 for the competitive exergame participants.

Supplementary Table 1c.

Estimates of fixed effects from individual growth curve analyses of change in peer support during exergame intervention by condition.

|                    |    | Model A  | Model B  |
|--------------------|----|----------|----------|
| Intercept          | B  | 71.70 ** | 66.16 ** |
|                    | SE | 3.87     | 3.51     |
| Time               | B  | -0.06 *  | 0.07 **  |
|                    | SE | 0.03     | 0.02     |
| Cooperative        | B  | 1.11     | 6.65     |
|                    | SE | 5.24     | 4.98     |
| Cooperative x Time | B  | 0.10 *   | -0.03    |
|                    | SE | 0.04     | 0.03     |
| Competitive        | B  | -5.54    |          |
|                    | SE | 5.22     |          |
| Competitive x Time | B  | 0.12 **  |          |
|                    | SE | 0.03     |          |
| Control            | B  |          | 5.54     |
|                    | SE |          | 5.22     |
| Control x Time     | B  |          | -0.12 ** |
|                    | SE |          | 0.03     |

*Note.* \*\*  $p < .01$ . \*  $p < .05$ . In Model A, Cooperative Exergame = 1 for the cooperative exergame participants, Competitive Exergame = 1 for the competitive exergame participants, and Control = 0 for the control participants. In Model B, Cooperative Exergame = 1 for the cooperative exergame participants, Control = 1 for the control participants, and Competitive Exergame = 0 for the competitive exergame participants.
